# Supplementary material for: Hierarchical cooperative binary ionic porphyrin nanocomposites
Source: Royal Society of Chemistry journal article supplement (doi:10.1039/c2cc30845b), 2012-01-01
Supplement: c2cc30845b.pdf [file c2cc30845b.pdf]

Supporting Information for

## Hybrid Cooperative Binary Ionic Porphyrin Nanocomposites

*Yongming Tian, Tito Busani, Gregory H. Uyeda, Kathleen E. Martin, Frank van Swol, Craig J. Medforth, Gabriel A. Montaña, and John A. Shelnutt\**

*Advanced Materials Laboratory, Sandia National Laboratories, Albuquerque, NM 87106, USA*

*Department of Materials Engineering, New Mexico Institute of Mining and Technology, Socorro, NM 87801, USA*

*Universidade Nova de Lisboa at CENIMAT/I3N, Departamento de Ciência dos Materials, Faculdade de Ciências e Tecnologia and CEMOP-UNINOVA, 2829-516, Caparica, Portugal*

*Departments of Electrical and Computer Engineering, Chemical and Nuclear Engineering, and Biology, University of New Mexico, Albuquerque, NM 87106, USA*

*Center for Integrated Nanotechnologies, Los Alamos National Laboratories, Albuquerque, NM 87185, USA*

*REQUIMTE/Departamento de Química e Bioquímica, Faculdade de Ciências, Universidade do Porto, 4169-007 Porto, Portugal*

*Department of Chemistry, University of Georgia, Athens, GA 30602, USA, E-mail: [jasheln@unm.edu](mailto:jasheln@unm.edu)*

**Table S1. Angles ( $2\theta$ ) in degrees of main X-ray reflections for various porphyrin CBI clovers and their hybrid nanocomposites. Peak positions taken from Lorentzian spectral fits ( $\pm 0.05^\circ$ ).**

| Structure        | 1    | 2     | 3     | 4     | 5     | 6     | 7     | 8     |
|------------------|------|-------|-------|-------|-------|-------|-------|-------|
| Sn/Zn            | 7.72 | 11.06 | 15.72 | 19.23 | 20.88 | 25.04 | 29.63 | 39.70 |
| Sn/Co            | 7.93 | 11.16 | 15.79 | 19.36 | 21.64 | 25.31 | 29.79 | -     |
| Zn/Sn            | 7.85 | 11.10 | 15.60 | 19.55 | -     | 25.75 | 29.85 | 39.70 |
| Zn/Co            | 7.95 | 11.15 | 15.85 | 19.35 | 22.70 | -     | 29.95 | 39.70 |
| 20% Sn/Co-Sn/Zn  | 8.11 | 11.42 | 16.04 | 19.54 | 21.25 | 25.44 | 29.96 | -     |
| 40% Sn/Co- Sn/Zn | 7.97 | 11.34 | 15.97 | 19.45 | 21.18 | 25.31 | 29.84 | 39.65 |

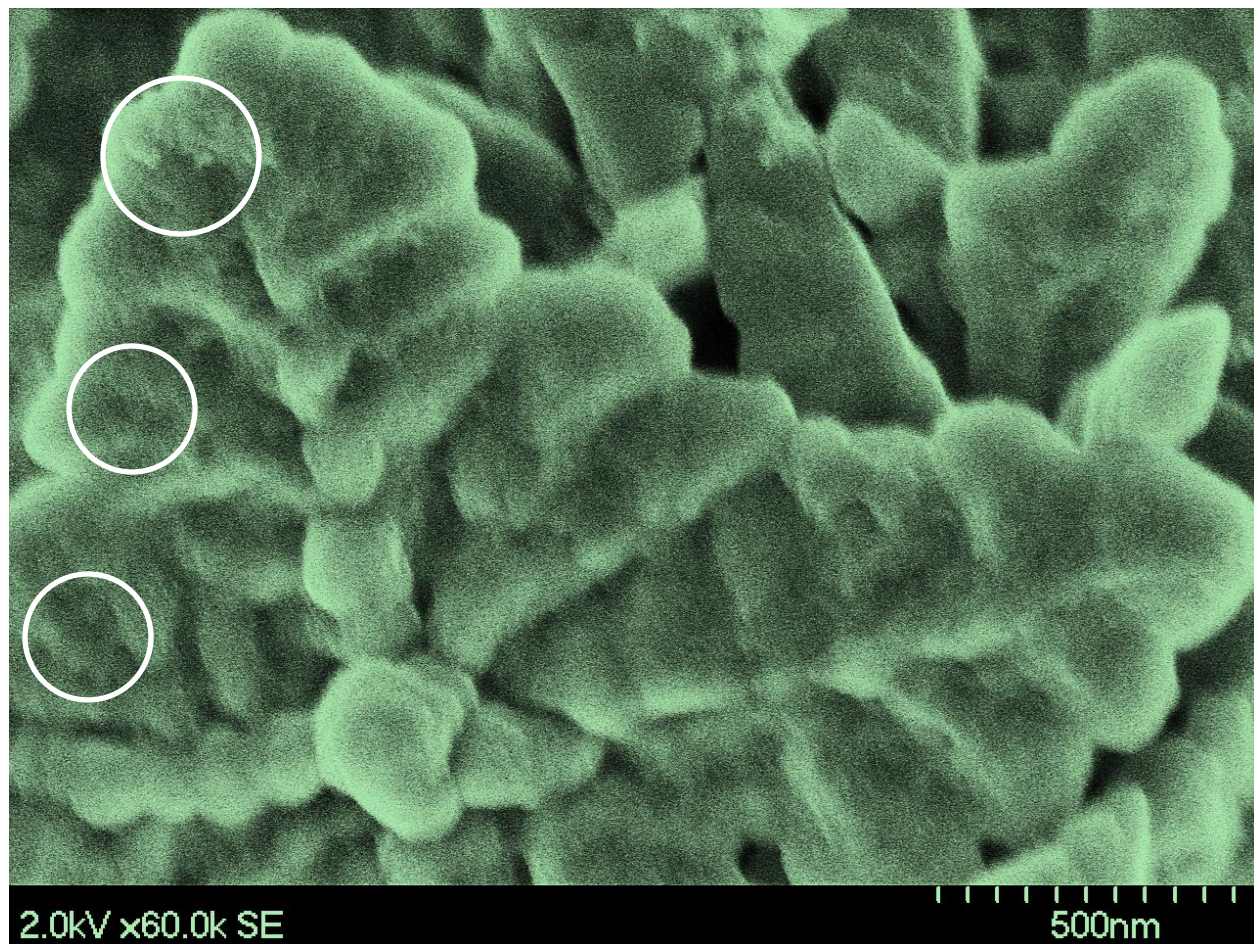

Fig. S1. SEM images of Sn/Co on Sn/Sn clovers at 10% loading. The typically smooth Sn/Zn clovers (see Fig. S9b) are decorated with very small nanoparticles of Sn/Co material (Fig. S9e) most obvious in the upper left region of this image.

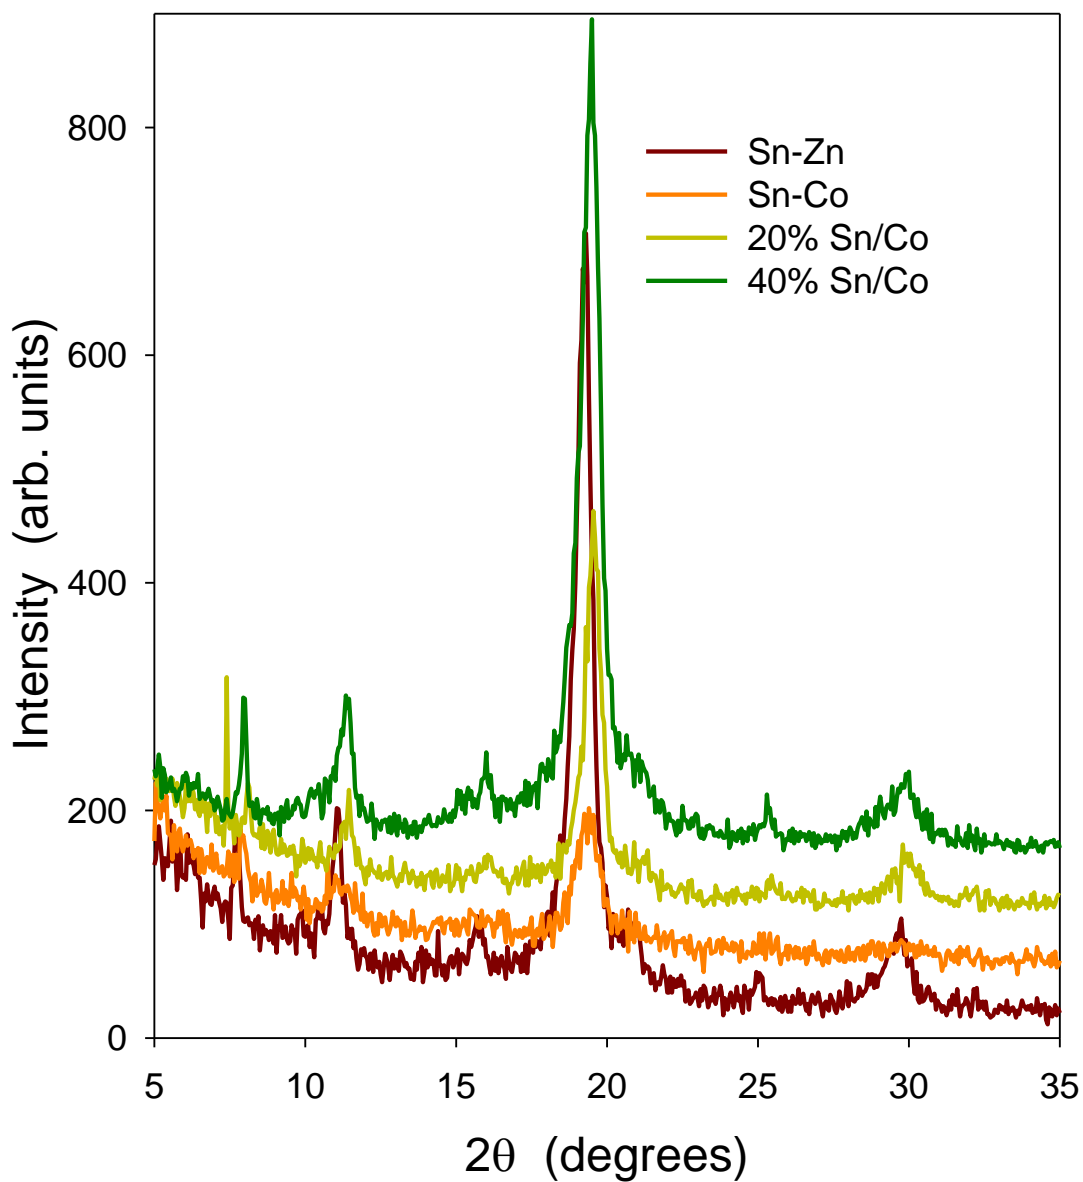

Fig. S2. XRD patterns of the Sn/Zn clovers, Sn/Co clovers, and the 20% Sn/Co on Sn/Zn clovers and 40% Sn/Co on Sn/Zn hybrid structures. The angles for the reflections in the XRD patterns are given in **Table S1**. Notice that the angles for the Sn/Co-Sn/Zn hybrids are greater than for the Sn/Zn clovers for the peaks at 7.72°, 19.23°, 20.88°, 25.04°, and 29.63°. Since the reflections of the Sn/Co clovers are also at higher angles the upshifts for the hybrids are likely due to the presence of the Sn/Co nanoparticles on the surface. However, the upshifts are generally larger than for the Sn/Co clovers possibly indicating strain in the Sn/Co solid particles. Some small shifts may also be a result of difference in dryness of the samples although the drying time was the approximately the same for all samples.

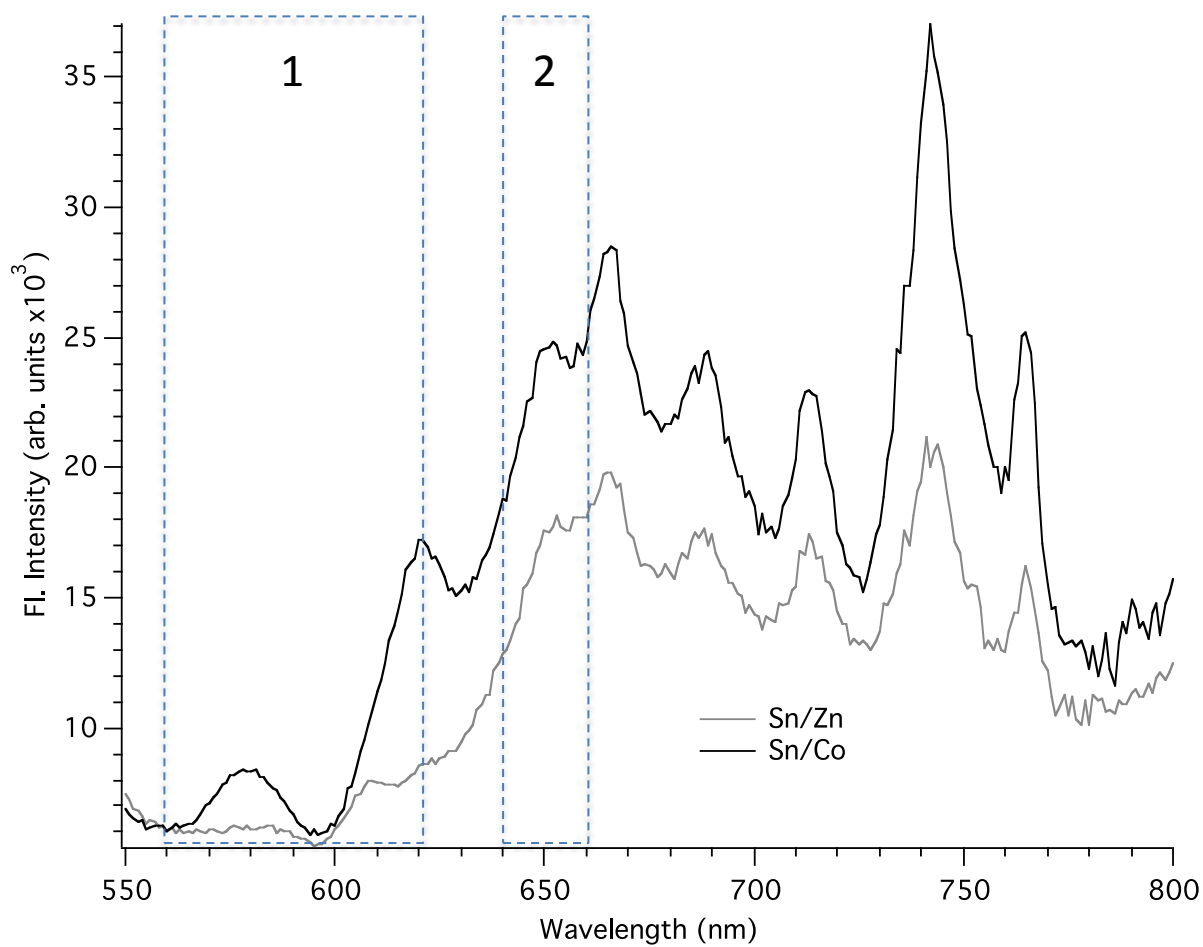

Fig. S3. Fluorescence emission spectra for Sn/Zn and Sn/Co clovers suspended in ethanol excited at 515 nm. The two boxes denote the regions for Ch. 1 and Ch. 2 used in the fluorescence microscopy data collection.

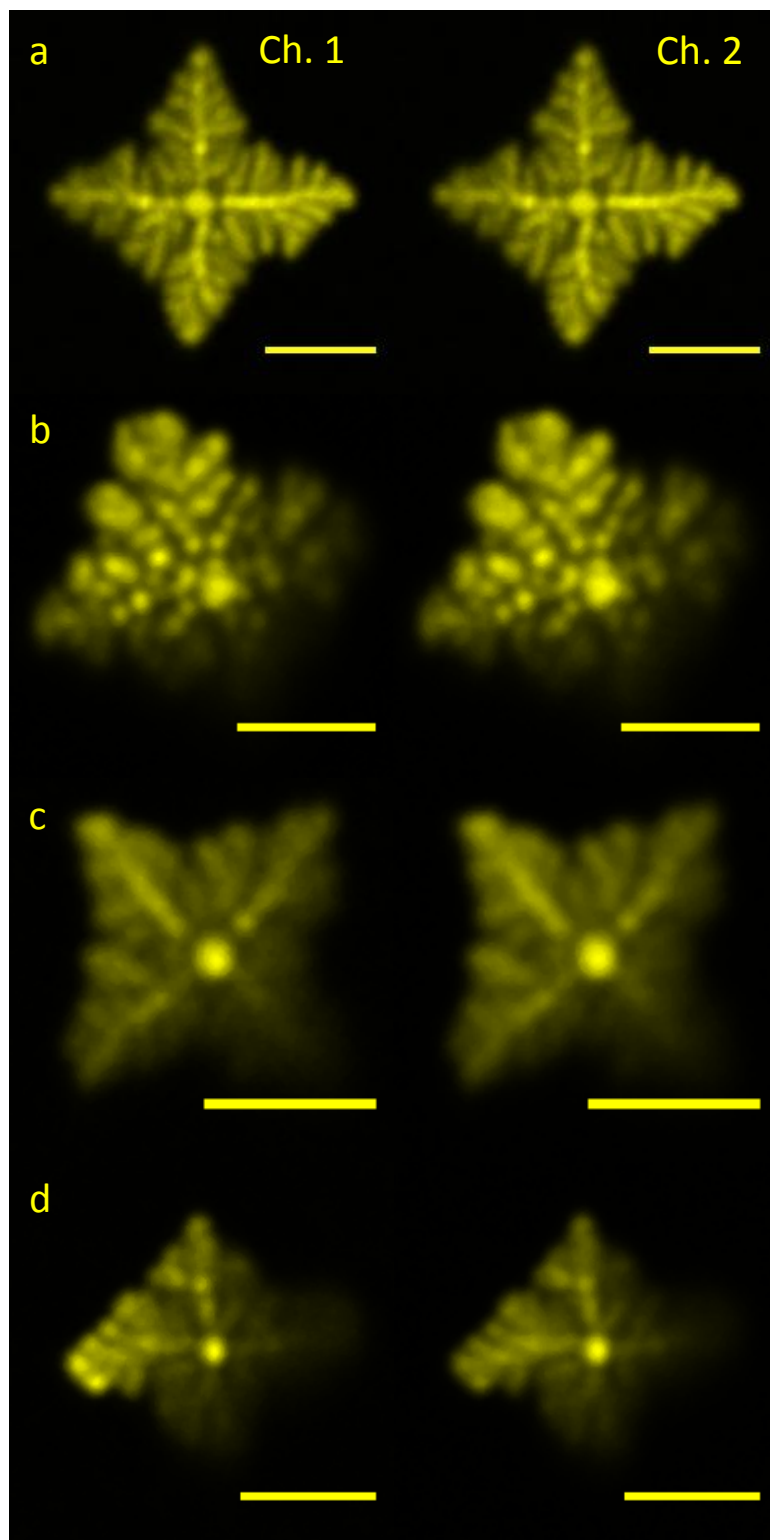

Fig. S4. Normalized fluorescence microscopy images of single clovers and Sn/Co-Sn/Zn nanocomposites. Ch. 1 is 560-620 nm and Ch. 2 is 640-660 nm. (a) Sn/Zn, (b) Sn/Co, (c) 20% Sn/Co-Sn/Zn, and (d) 40% Sn/Co-Sn/Zn. Scale bars are all 2  $\mu\text{m}$ .



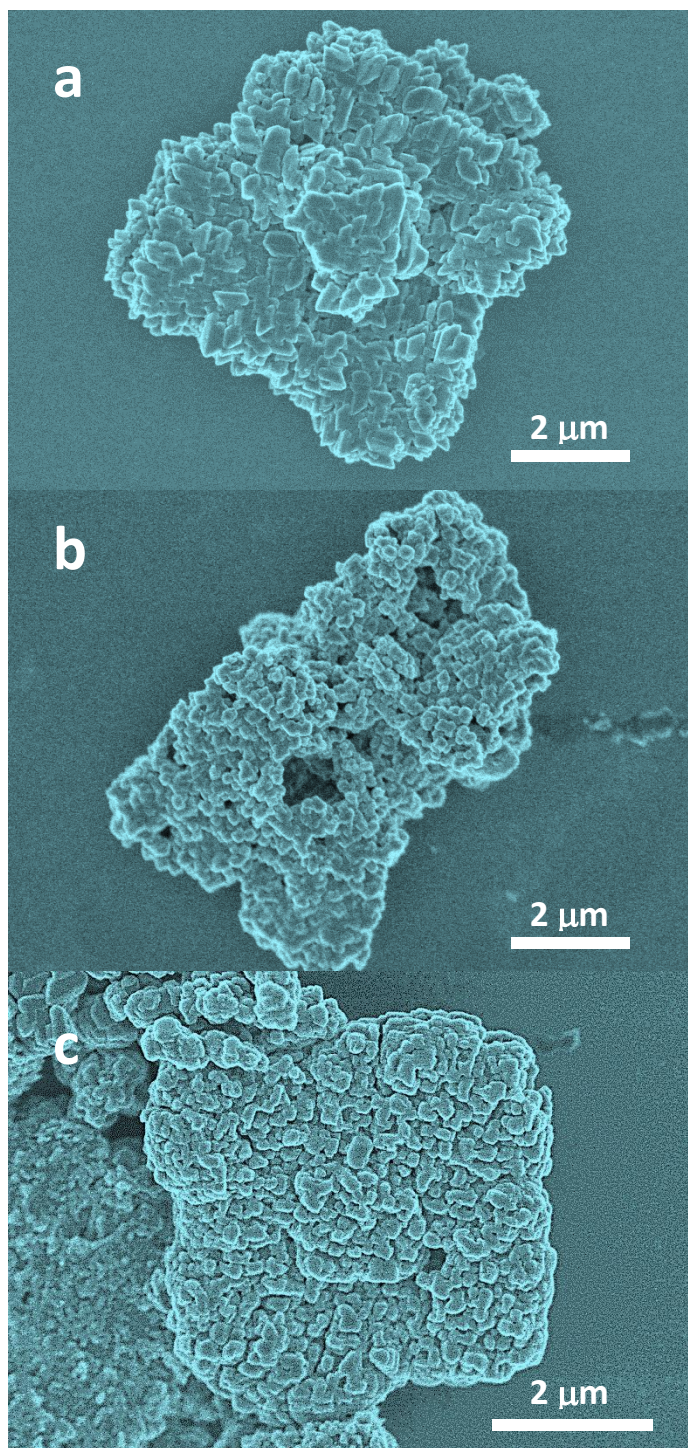

Fig. S5. SEM images of Sn/Co on Sn/Sn clovers at 10% (a), 20% (b), and 40% (c) loading. The structures have the shape of the Sn/Sn clovers (Fig. S9d) with a texture progressively closer to the Sn/Co clovers (Fig. S9e) at high loadings.

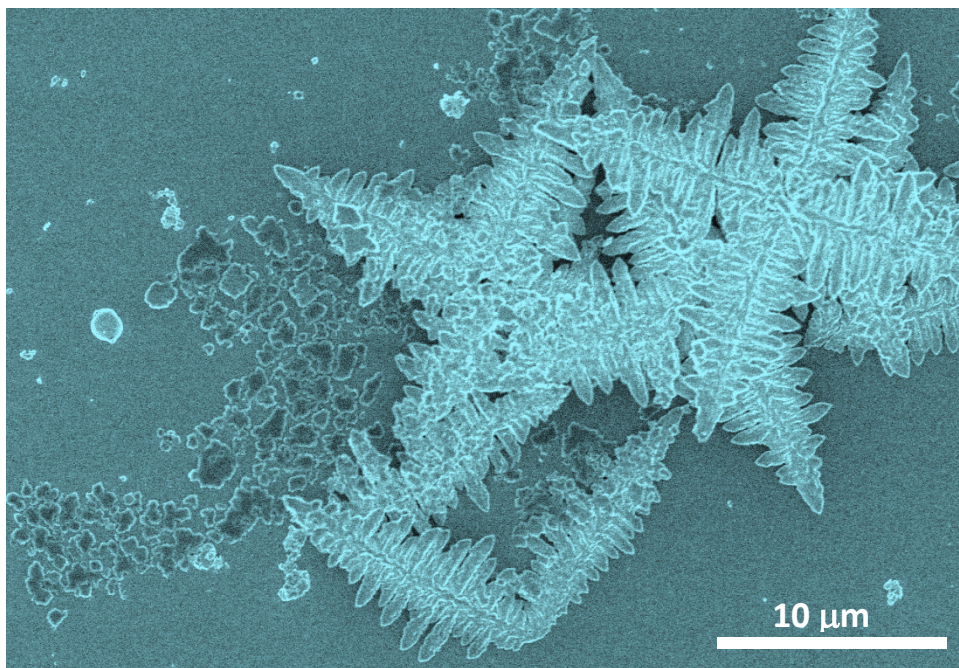

Fig. S6. SEM image of Zn/Co on Zn/Zn clovers with 20% loading shows phase separation rather than growth on the clovers. The Zn/Zn clovers are unchanged from those in Fig. S9c, and the dark material on the Si wafer is similar to the Zn/Co clovers in Fig. S9f.



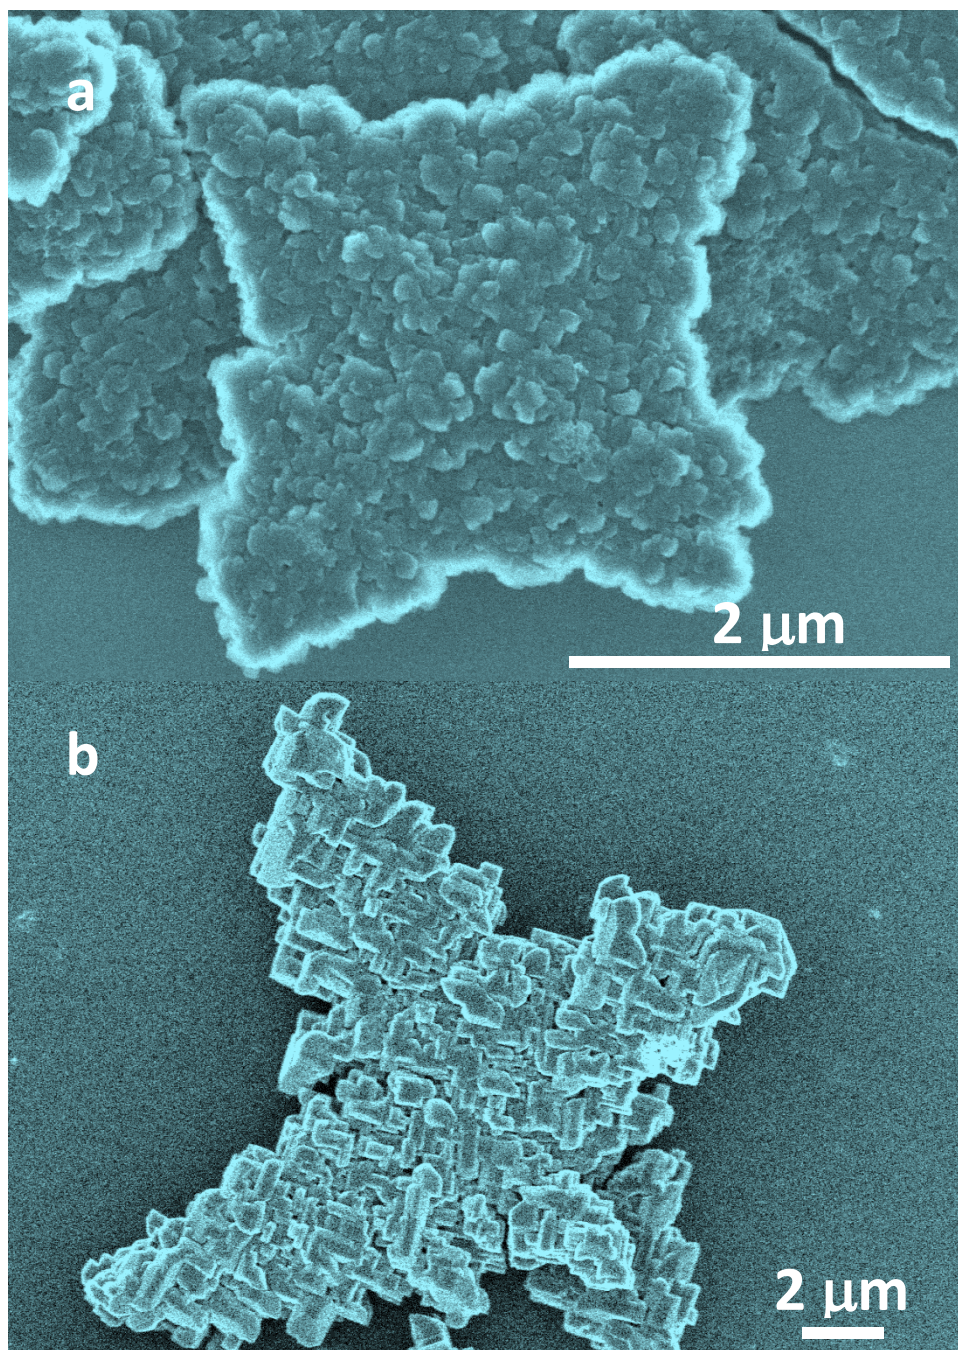

Fig. S7. SEM images of Sn/Sn on Zn/Sn clovers at 20% (a) and 40% (b) Sn/Sn coverage. At 20% (a), the shape is similar to the Zn/Sn clovers with a texture that resembles the Sn/Sn clovers in Fig. S9d. At 40% (b), the texture is even more similar to the Sn/Sn clovers.



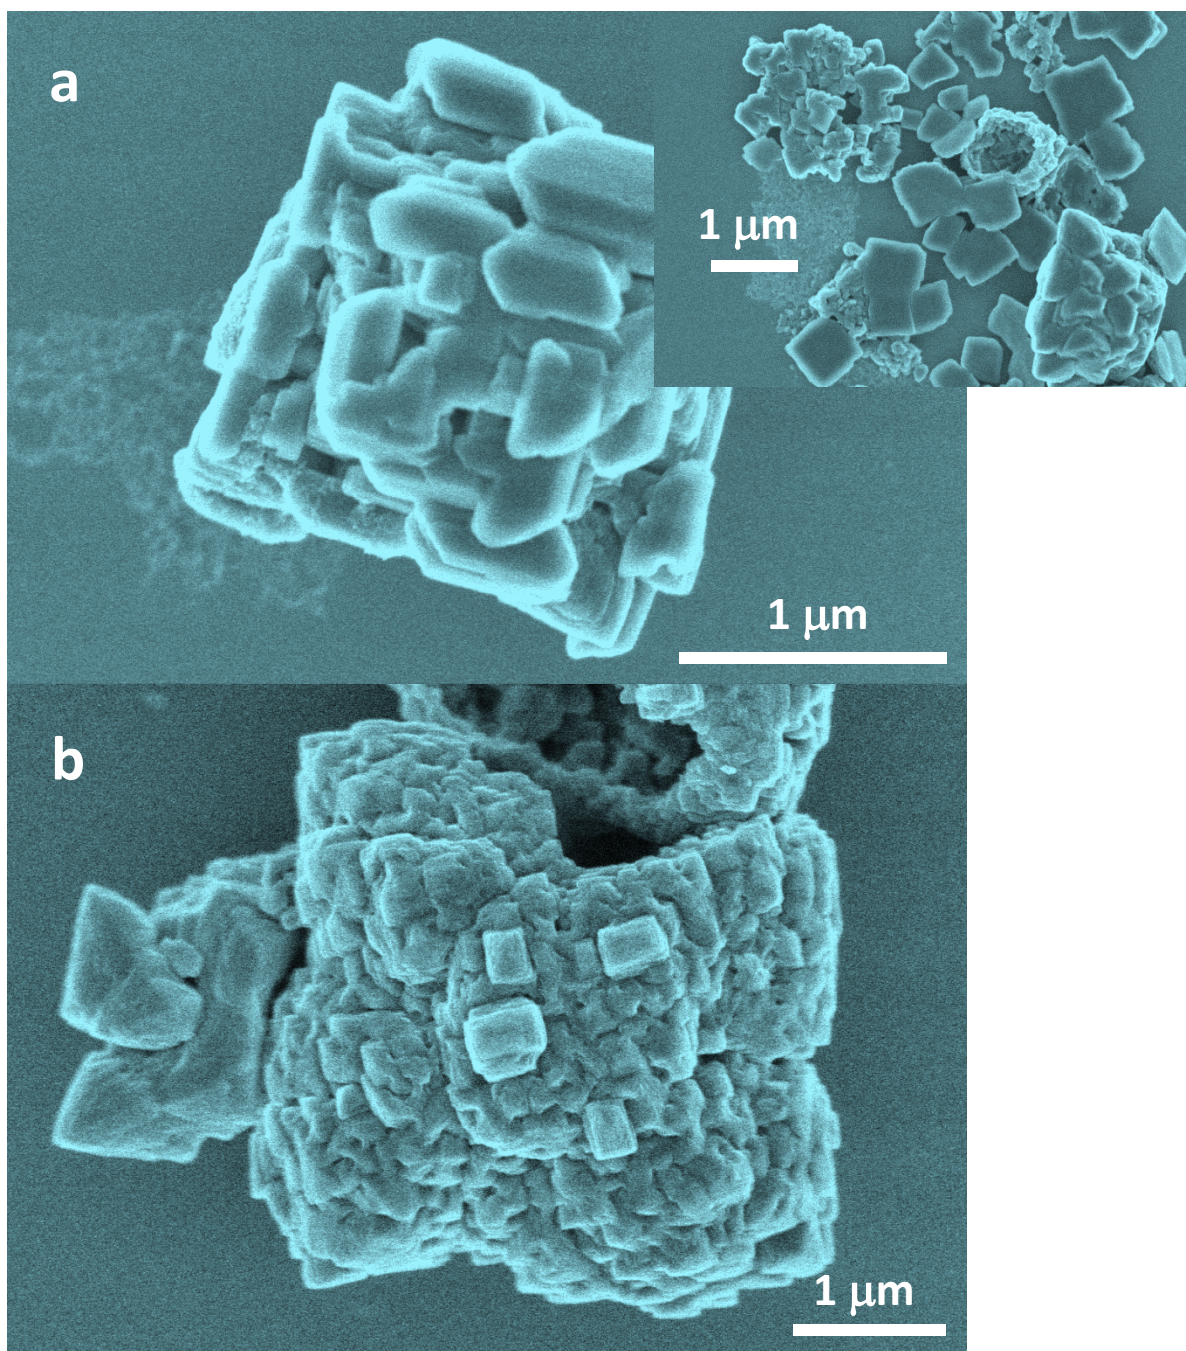

Fig. S8. SEM images of Zn/Sn on Sn/Sn clovers at 20% (a) and 40% (b) Zn/Sn loading. Clover-like structures are similar to the Sn/Sn clovers at pH 5. Inset: phase separation appears to occur (shown for 20% case) with structures resembling both the Zn/Sn clovers (Fig. S9a) and the Sn/Sn clovers (Fig. S9d).



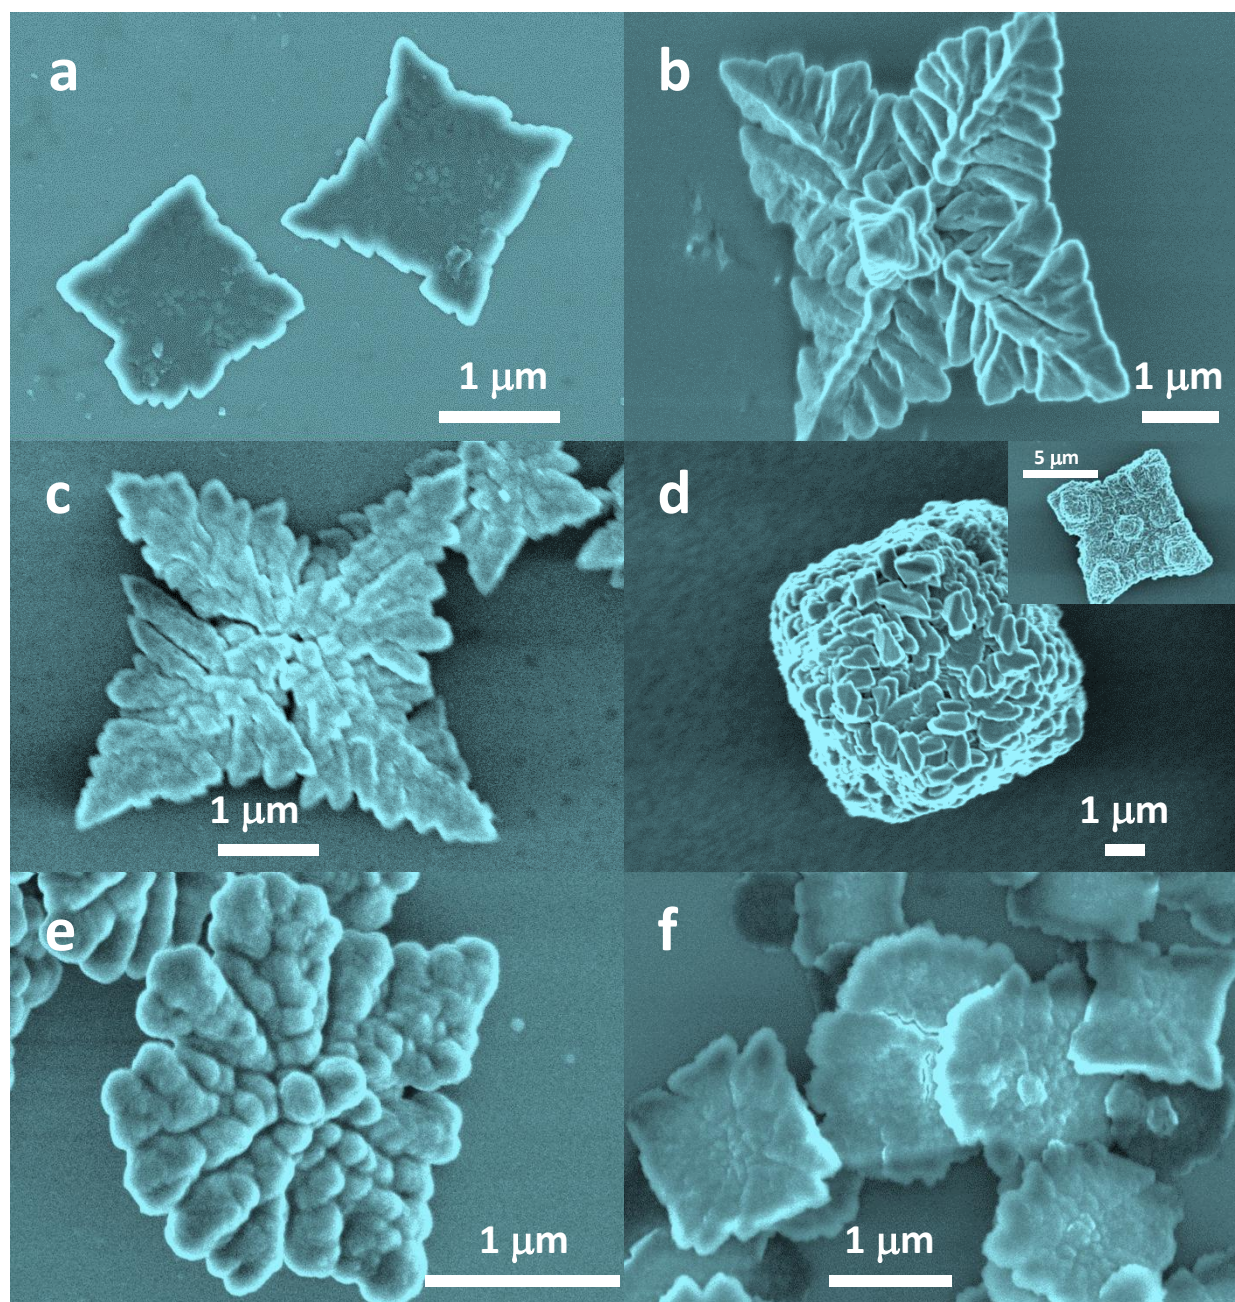

Fig. S9. SEM images of (a) Zn/Sn, (b) Sn/Zn, (c) Zn/Zn, (d) Sn/Sn, (e) Sn/Co, and (f) Zn/Co clovers. Inset in (d) is a slightly different clover-like morphology that coexists in the sample.
